# Supplementary material for: Tannin-based supplementation influences gut microbiota composition and activity in IBS-D patients with a potential impact on symptoms: a pilot study
Source: Royal Society of Chemistry journal article supplement (doi:10.1039/d4fo02236j), 2024-01-01
Supplement: d4fo02236j1.pdf [file d4fo02236j1.pdf]

## *Supplementary Material*

### **Tannin-based supplementation influences gut microbiota composition and activity in IBS-D patients with a potential impact on symptoms: A pilot study.**

Silvia Molino,<sup>\*a</sup> Alberto Lerma-Aguilera,<sup>b</sup> María Marta Piskorz,<sup>c</sup> Fabiana López Mingorance,<sup>d</sup> Juan M. Montero,<sup>c</sup> Tatiana Uehara,<sup>c</sup> Harumi Hashimoto,<sup>c</sup> Esteban González Ballerga,<sup>e</sup> Jorge A. Olmos<sup>c</sup>

<sup>a</sup> Silvateam Spa, R&D Unit, San Michele Mondovì, Italy

<sup>b</sup> Area de Genòmica i Salut, Fundació per al Foment de la Investigació Sanitària i Biomèdica de la Comunitat Valenciana (FISABIO-Salut Pública), València, Spain

<sup>c</sup> Universidad de Buenos Aires, Hospital de Clínicas José de San Martín, Sector Neurogastroenterología del Servicio de Gastroenterología, Buenos Aires Argentina

<sup>d</sup> Universidad de Buenos Aires/ IBIMOL, Hospital de Clínicas José de San Martín, Programa de Estudios Pancreáticos, Buenos Aires, Argentina

<sup>e</sup> Universidad de Buenos Aires, Hospital de Clínicas José de San Martín, Servicio de Gastroenterología, Buenos Aires Argentina.

**\* Corresponding author:**

Silvia Molino [smolino@silvateam.com](mailto:smolino@silvateam.com)

## Supplementary Figures

| Clinic measure        | log2FC | p.signif |
|-----------------------|--------|----------|
| Stress                | -0,152 | ns       |
| Anxiety               | -0,181 | *        |
| Depression            | -0,209 | *        |
| Likert pain           | -0,380 | ns       |
| Bristol               | -0,428 | ****     |
| IBSS                  | -0,434 | ***      |
| Depositions frequency | -0,501 | **       |
| PHQ15                 | -0,507 | ***      |
| Likert global         | -0,592 | **       |
| Likert distension     | -0,664 | **       |

**Figure S1** Evaluation of clinical variables indices evaluated with different questionnaires. The variation is represented as log2FC between the subjects after and before the 8-week supplementation. Statistical significance represented as \*, \*\* and \*\*\* indicates significant differences by Wilcoxon signed-rank test:  $p < 0.05$ , \*  $p < 0.01$  and \*\*  $p < 0.001$ .

**Table S1** Differential abundance ANCOMBC test at phylum, genus and species level are represented in each sheet, respectively. Each row shows for a specific taxon the outcome of ANCOM-BC differential abundance test, including p-value, adj. p-value, T0 mean relative abundance, TF, mean relative abundance and log2FC (log2 Fold Change). Only adj p-value<0.05 are considered as significant.
