# Supplementary material for: Tannin-based supplementation influences gut microbiota composition and activity in IBS-D patients with a potential impact on symptoms: a pilot study
Source: Royal Society of Chemistry journal article supplement (doi:10.1039/d4fo02236j), 2024-01-01
Supplement: d4fo02236j2.xlsx [file d4fo02236j2.xlsx]

## Sheet: T0 vs TF Phylum level
feature	ANCOMBC.pval	ANCOMBC.adjpval.fdr	mean1	mean2	log2FC
p__Bacillota	5.69556e-14	3.41733e-13	58.5276	46.3586	0.333643
p__Actinomycetota	3.77762e-13	1.13329e-12	5.19428	2.14964	1.13034
p__Desulfobacterota	0.000349844	0.000699688	0.282001	0.539656	-0.456162

## Sheet: T0 vs TF Genus level
feature	ANCOMBC.pval	ANCOMBC.adjpval.fdr	mean1	mean2	log2FC
p__Bacillota;c__Clostridia;o__Lachnospirales;f__Lachnospiraceae;g__Dorea	2.31768135822236e-20	1.78461464583121e-18	2.59537588199433	1.22012544591486	1.07782091803618
p__Bacillota;c__Clostridia;o__Lachnospirales;f__Lachnospiraceae;g__[Eubacterium] hallii group	1.33275665312317e-13	5.13111311452422e-12	0.974675650481836	0.439242464053462	1.1185400226855
p__Bacillota;c__Clostridia;o__Lachnospirales;f__Lachnospiraceae;g__Blautia	1.35117278924713e-12	3.46801015906763e-11	7.13509157189067	3.65170828601045	0.96292143585864
p__Bacillota;c__Clostridia;o__Lachnospirales;f__Lachnospiraceae;g__Lachnospiraceae FCS020 group	3.19739911532645e-10	6.15499329700342e-09	0.0915014238442531	0.0200279291216745	1.52839822740167
p__Bacteroidota;c__Bacteroidia;o__Bacteroidales;f__Bacteroidaceae;g__Bacteroides	1.40136377865352e-08	2.15810021912642e-07	13.880629347574	22.2417847812775	-0.679501084153602
p__Actinomycetota;c__Coriobacteriia;o__Coriobacteriales;f__Coriobacteriaceae;g__Collinsella	3.22951699518822e-08	4.14454681049155e-07	1.73363778641137	0.81585943952151	1.0709226367621
p__Bacillota;c__Bacilli;o__Erysipelotrichales;f__Erysipelotrichaceae;g__Holdemanella	3.19145805371481e-07	3.5106038590863e-06	0.723970773924698	0.332842532271769	1.08076417685484
p__Bacillota;c__Clostridia;o__Lachnospirales;f__Lachnospiraceae;g__[Ruminococcus] gauvreauii group	4.72892144534497e-07	4.55158689114453e-06	0.473153686138035	0.20982538705091	1.10859919064367
p__Bacillota;c__Clostridia;o__Lachnospirales;f__Lachnospiraceae;g__Marvinbryantia	1.35987899359059e-06	1.16345202784973e-05	0.0612254695513578	0.0186098098074293	1.11594297605426
p__Bacteroidota;c__Bacteroidia;o__Bacteroidales;f__Tannerellaceae;g__Parabacteroides	1.65588920939722e-06	1.27503469123586e-05	1.12732369852394	2.11062292264253	-0.894225520411575
p__Bacillota;c__Clostridia;o__Lachnospirales;f__Lachnospiraceae;g__Anaerostipes	6.23502135765839e-06	4.36451495036087e-05	0.836364345997027	0.391041319526812	1.06279607239529
p__Bacillota;c__Clostridia;o__Lachnospirales;f__Lachnospiraceae;g__Fusicatenibacter	2.13723182840595e-05	0.000132790797633434	0.948918151589665	0.512143366316071	0.867139067683415
p__Bacteroidota;c__Bacteroidia;o__Bacteroidales;f__Rikenellaceae;g__Alistipes	2.24192255744759e-05	0.000132790797633434	1.0643762651916	2.07055723342635	-0.948371351908181
p__Bacillota;c__Clostridia;o__Lachnospirales;f__Lachnospiraceae;g__Lachnospiraceae ND3007 group	3.5966865746456e-05	0.000197817761605508	0.211587092416043	0.068926988112676	1.40223880497949
p__Actinomycetota;c__Coriobacteriia;o__Coriobacteriales;f__Eggerthellaceae;g__Senegalimassilia	5.32959141639879e-05	0.000273585692708471	0.228582779517921	0.0419507101424275	2.04211945695949
p__Bacillota;c__Bacilli;o__Erysipelotrichales;f__Erysipelatoclostridiaceae;g__Catenibacterium	9.22206359563951e-05	0.000443811810540152	0.928563361805777	0.465288282797817	0.969967024110487
p__Bacillota;c__Clostridia;o__Peptostreptococcales-Tissierellales;f__Peptostreptococcaceae;g__Intestinibacter	0.000132402791725322	0.000584155789885066	0.0429444179480865	0.00659195381001869	1.31295756643444
p__Bacillota;c__Clostridia;o__Oscillospirales;f__Ruminococcaceae;g__CAG-352	0.000136555898934171	0.000584155789885066	1.26913850744914	0.387201203706527	1.66771068483216
p__Bacillota;c__Clostridia;o__Oscillospirales;f__Oscillospiraceae;g__UCG-003	0.000184204646461648	0.000746513567239309	0.107249726198114	0.193636857432927	-0.757272715912277
p__Bacillota;c__Clostridia;o__Lachnospirales;f__Lachnospiraceae;g__[Eubacterium] ventriosum group	0.000465070527634569	0.00179052153139309	0.152027092694094	0.084828942733383	0.726095360714658
p__Bacillota;c__Clostridia;o__Lachnospirales;f__Lachnospiraceae;g__Agathobacter	0.000509067038350816	0.00186657914061966	4.76122722525145	2.70670259953542	0.810702263837841
p__Bacillota;c__Bacilli;o__Erysipelotrichales;f__Erysipelatoclostridiaceae;g__Erysipelotrichaceae UCG-003	0.000668807971137263	0.00234082789898042	0.386853267576578	0.101170272378857	1.76526360233607
p__Proteobacteria;c__Gammaproteobacteria;o__Enterobacterales;f__Enterobacteriaceae;g__Escherichia-Shigella	0.000751616515699794	0.00251628137864714	1.32298461533841	0.52037895656746	1.31676557092191
p__Bacillota;c__Clostridia;o__Lachnospirales;f__Lachnospiraceae;g__Lachnospiraceae NK4A136 group	0.00105678751486329	0.00329970956337944	0.597225921767457	1.13387304421997	-0.904907147550664
p__Proteobacteria;c__Gammaproteobacteria;o__Burkholderiales;f__Sutterellaceae;g__Parasutterella	0.00107133427382449	0.00329970956337944	0.275875006362019	0.446585914213122	-0.660930392337018
p__Bacillota;c__Clostridia;o__Oscillospirales;f__Oscillospiraceae;g__UCG-005	0.00137587476476499	0.0040747060341117	0.367482100060124	0.557280509573173	-0.577730157627439
p__Bacteroidota;c__Bacteroidia;o__Bacteroidales;f__Prevotellaceae;g__Paraprevotella	0.00181749014171561	0.00518321262637413	0.349902705164013	0.72904640653445	-1.02208059144806
p__Bacillota;c__Clostridia;o__Peptostreptococcales-Tissierellales;f__Anaerovoracaceae;g__Family XIII UCG-001	0.00191362541536202	0.00526246989224555	0.0430453415657551	0.0247917684818512	0.513598435515033
p__Bacillota;c__Clostridia;o__Peptostreptococcales-Tissierellales;f__Peptostreptococcaceae;g__Romboutsia	0.00224549960713616	0.00596218861205118	0.620783047555023	0.114640750485902	2.26869860333297
p__Bacillota;c__Bacilli;o__Lactobacillales;f__Streptococcaceae;g__Streptococcus	0.00300199762967823	0.00770512724950747	0.716580579845072	0.946457961018878	-0.392846285173992
p__Bacillota;c__Clostridia;o__Clostridiales;f__Clostridiaceae;g__Clostridium sensu stricto 1	0.00373686508131206	0.00928189068583964	0.408761389817168	0.138115092582528	1.45142938117427
p__Bacillota;c__Clostridia;o__Lachnospirales;f__Lachnospiraceae;g__[Ruminococcus] torques group	0.00404764878652307	0.00973965489257114	1.71406520777801	1.07700191497354	0.661610249947972
p__Desulfobacterota;c__Desulfovibrionia;o__Desulfovibrionales;f__Desulfovibrionaceae;g__Desulfovibrio	0.00460613619073397	0.0107476511117126	0.149322210030892	0.263592575854973	-0.751344380152662
p__Bacillota;c__Clostridia;o__Lachnospirales;f__Lachnospiraceae;g__Lachnoclostridium	0.00572394621050505	0.0129630546532026	1.42647728214682	2.00215838579074	-0.483950494074072
p__Bacillota;c__Clostridia;o__Oscillospirales;f__Ruminococcaceae;g__Ruminococcus	0.00620066230858377	0.013614031679493	3.32569985931777	2.15027629329354	0.624921072849578
p__Actinomycetota;c__Coriobacteriia;o__Coriobacteriales;f__Eggerthellaceae;g__Eggerthella	0.00636500182417853	0.013614031679493	0.105054489485223	0.0383118049064203	1.129234992912
p__Bacillota;c__Clostridia;o__Lachnospirales;f__Lachnospiraceae;g__Lachnospira	0.00999161350136474	0.0207933578271645	0.954361597604059	1.46650248956723	-0.610467925640013
p__Actinomycetota;c__Coriobacteriia;o__Coriobacteriales;f__Eggerthellaceae;g__Slackia	0.011038748798431	0.0223679909862944	0.0837789350863158	0.0347109871811757	0.950637634768739
p__Desulfobacterota;c__Desulfovibrionia;o__Desulfovibrionales;f__Desulfovibrionaceae;g__Bilophila	0.0150237259867209	0.0296622282301925	0.0963767602016885	0.160722399049262	-0.644399120193868
p__Bacillota;c__Clostridia;o__Lachnospirales;f__Lachnospiraceae;g__Coprococcus	0.0165966873721986	0.0319486231914824	1.39798807662343	0.986212966811588	0.495787308230429
p__Bacteroidota;c__Bacteroidia;o__Bacteroidales;f__Marinifilaceae;g__Odoribacter	0.0171810517025465	0.0322668531974655	0.0976245604399579	0.181389210192091	-0.786684959029225
p__Bacillota;c__Clostridia;o__Lachnospirales;f__Lachnospiraceae;g__Roseburia	0.0251124150314784	0.0460394275577105	1.86399667118807	1.34492176291574	0.465591691154454
p__Bacillota;c__Clostridia;o__Oscillospirales;f__Ruminococcaceae;g__[Eubacterium] siraeum group	0.0257664504957529	0.0461399229807669	0.196333887844795	0.353059086347861	-0.792084731594465

## Sheet: T0 vs TF Species level
feature	ANCOMBC.pval	ANCOMBC.adjpval.fdr	mean1	mean2	log2FC
p__Bacillota;c__Clostridia;o__Lachnospirales;f__Lachnospiraceae;g__Dorea;s__longicatena	4.63498118627127e-13	2.87368833548819e-11	1.86113965161004	0.926346095087507	0.981637021248151
p__Bacillota;c__Clostridia;o__Lachnospirales;f__Lachnospiraceae;g__[Eubacterium] hallii group;s__hallii	1.52009618796633e-12	4.71229818269561e-11	0.974675650481836	0.439242464053462	1.09390771050053
p__Actinomycetota;c__Coriobacteriia;o__Coriobacteriales;f__Coriobacteriaceae;g__Collinsella;s__aerofaciens	7.7548513857831e-12	1.60266928639517e-10	1.72614904018444	0.810120537820744	1.06132816362776
p__Bacillota;c__Clostridia;o__Lachnospirales;f__Lachnospiraceae;g__Anaerostipes;s__hadrus	1.4823610016884e-07	1.8914706744076e-06	0.791173176135752	0.332303343720383	1.17449746761255
p__Bacillota;c__Bacilli;o__Erysipelotrichales;f__Erysipelotrichaceae;g__Holdemanella;s__biformis	1.52537957613516e-07	1.8914706744076e-06	0.723970773924698	0.332842532271769	1.0496124285118
p__Bacillota;c__Clostridia;o__Lachnospirales;f__Lachnospiraceae;g__Blautia;s__faecis	2.35240180898789e-07	2.43081520262082e-06	0.538097132618862	0.230012554304268	1.11947258052707
p__Bacillota;c__Clostridia;o__Lachnospirales;f__Lachnospiraceae;g__Blautia;s__massiliensis	7.43173097637213e-07	6.58239029335818e-06	1.5282019419253	0.742132701509028	1.01041671752363
p__Bacteroidota;c__Bacteroidia;o__Bacteroidales;f__Bacteroidaceae;g__Bacteroides;s__caccae	4.34105961947925e-06	3.36432120509642e-05	0.171075122054768	0.588016399359873	-1.60692366187964
p__Bacillota;c__Clostridia;o__Lachnospirales;f__Lachnospiraceae;g__Coprococcus;s__catus	1.2811023934729e-05	7.97807743236431e-05	0.339466655281584	0.14155726760153	1.0946997293613
p__Bacillota;c__Clostridia;o__Lachnospirales;f__Lachnospiraceae;g__Fusicatenibacter;s__saccharivorans	1.28678668263941e-05	7.97807743236431e-05	0.948918151589665	0.512143366316071	0.849312294778428
p__Bacillota;c__Clostridia;o__Lachnospirales;f__Lachnospiraceae;g__Dorea;s__formicigenerans	4.49891986145342e-05	0.000253575483100102	0.503754107834656	0.272266802959879	0.81478852666816
p__Bacteroidota;c__Bacteroidia;o__Bacteroidales;f__Bacteroidaceae;g__Bacteroides;s__vulgatus	6.50158291345071e-05	0.000335915117194953	2.94939266202999	6.3761525930273	-1.10373922347023
p__Actinomycetota;c__Coriobacteriia;o__Coriobacteriales;f__Eggerthellaceae;g__Senegalimassilia;s__anaerobia	0.000143149239591323	0.000663948339514393	0.228582779517921	0.0419507101424275	1.80728932345448
p__Bacillota;c__Bacilli;o__Erysipelotrichales;f__Erysipelatoclostridiaceae;g__Catenibacterium;s__mitsuokai	0.000149923818600024	0.000663948339514393	0.928563361805777	0.463581618117087	0.953763067384423
p__Bacillota;c__Clostridia;o__Lachnospirales;f__Lachnospiraceae;g__[Eubacterium] ventriosum group;s__ventriosum	0.000485320368112079	0.00200599085486326	0.146055258037909	0.0785432026600172	0.684234845892717
p__Bacteroidota;c__Bacteroidia;o__Bacteroidales;f__Rikenellaceae;g__Alistipes;s__putredinis	0.000579119748193537	0.00224408902424996	0.459465550066264	0.805422743164046	-0.768009552244027
p__Proteobacteria;c__Gammaproteobacteria;o__Burkholderiales;f__Sutterellaceae;g__Parasutterella;s__excrementihominis	0.000630911043931012	0.00230096968963075	0.259535539879623	0.424640767625464	-0.646125643456932
p__Bacteroidota;c__Bacteroidia;o__Bacteroidales;f__Tannerellaceae;g__Parabacteroides;s__merdae	0.00114429317681373	0.00385098981277469	0.356405795012853	0.735686614013061	-0.981657346427613
p__Bacillota;c__Bacilli;o__Erysipelotrichales;f__Erysipelatoclostridiaceae;g__Erysipelotrichaceae UCG-003;s__bacterium_GAM147	0.0011899166600375	0.00385098981277469	0.280535042310076	0.0783443017961139	1.49605264457475
p__Bacteroidota;c__Bacteroidia;o__Bacteroidales;f__Prevotellaceae;g__Paraprevotella;s__clara	0.00124225477831442	0.00385098981277469	0.304383399427192	0.691295659161448	-1.10285975454174
p__Bacillota;c__Clostridia;o__Lachnospirales;f__Lachnospiraceae;g__Lachnospiraceae NK4A136 group;s__bacterium_GAM79	0.00134326446905451	0.00396582843244665	0.240546066586786	0.596050625689761	-1.2022666937226
p__Bacillota;c__Clostridia;o__Lachnospirales;f__Lachnospiraceae;g__Blautia;s__stercoris	0.0014774411171393	0.0041636976937562	0.161850264060211	0.0803678862512527	0.782916996284268
p__Bacillota;c__Clostridia;o__Lachnospirales;f__Lachnospiraceae;g__Roseburia;s__inulinivorans	0.00419602793095645	0.0113110318138826	0.812340995267263	0.449875165130035	0.808258850979531
notAssigned	0.00557052504088279	0.0143905230222805	36.9826961953977	34.4459408051369	0.10242254834766
p__Actinomycetota;c__Coriobacteriia;o__Coriobacteriales;f__Eggerthellaceae;g__Eggerthella;s__lenta	0.00604572793620418	0.0149934052817864	0.105054489485223	0.0383118049064203	0.955900937669438
p__Bacteroidota;c__Bacteroidia;o__Bacteroidales;f__Bacteroidaceae;g__Bacteroides;s__uniformis	0.00665330803629035	0.0158655807019231	1.03382799760572	1.68328615174824	-0.686112554349668
p__Bacillota;c__Clostridia;o__Lachnospirales;f__Lachnospiraceae;g__Blautia;s__obeum	0.00898441168003355	0.0206308712652622	0.749257465005904	0.456330199473669	0.677158981475962
p__Bacillota;c__Clostridia;o__Lachnospirales;f__Lachnospiraceae;g__Lachnospira;s__pectinoschiza	0.0103678502790361	0.0229573827607228	0.943189267013318	1.45826959751691	-0.61145796989662
p__Bacteroidota;c__Bacteroidia;o__Bacteroidales;f__Bacteroidaceae;g__Bacteroides;s__plebeius	0.0109273542146347	0.0233619297002535	2.61624685032718	3.01755306671831	-0.203509552632649
p__Desulfobacterota;c__Desulfovibrionia;o__Desulfovibrionales;f__Desulfovibrionaceae;g__Bilophila;s__wadsworthia	0.0158275325858652	0.0323214991555169	0.0963767602016885	0.160722399049262	-0.58350005874452
p__Bacillota;c__Clostridia;o__Lachnospirales;f__Lachnospiraceae;g__[Ruminococcus] torques group;s__lactaris	0.0164891097750882	0.0323214991555169	0.155143544622148	0.112387038281799	0.372597350676178
p__Bacteroidota;c__Bacteroidia;o__Bacteroidales;f__Bacteroidaceae;g__Bacteroides;s__massiliensis	0.0166820640802668	0.0323214991555169	1.86758845329436	2.33314039007584	-0.316133291789248
p__Bacteroidota;c__Bacteroidia;o__Bacteroidales;f__Marinifilaceae;g__Odoribacter;s__splanchnicus	0.0191872429486155	0.036048759479217	0.0921957997007556	0.172363300521979	-0.715313339071421
p__Bacteroidota;c__Bacteroidia;o__Bacteroidales;f__Rikenellaceae;g__Alistipes;s__obesi	0.0217400396370988	0.0395252089199253	0.0271019350902231	0.0746233929602863	-0.84362711771862
p__Bacillota;c__Clostridia;o__Lachnospirales;f__Lachnospiraceae;g__Coprococcus;s__comes	0.0223126179386675	0.0395252089199253	0.647742794169559	0.428691392178437	0.560475873001845
p__Bacillota;c__Clostridia;o__Lachnospirales;f__Lachnospiraceae;g__[Ruminococcus] gnavus group;s__gnavus	0.0266927231802481	0.045201826227438	0.672115459878451	0.261843591708494	1.2587448174021
p__Bacteroidota;c__Bacteroidia;o__Bacteroidales;f__Bacteroidaceae;g__Bacteroides;s__thetaiotaomicron	0.0269752833937936	0.045201826227438	0.169264360693354	0.265759888363576	-0.563420454375199
